# Supplementary material
Source: publisher figshare collection journal article supplement (https://rs.figshare.com/ndownloader/files/13508006)

# Supplementary Figure 4

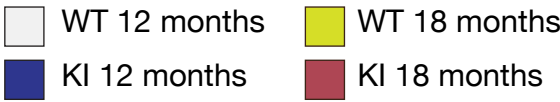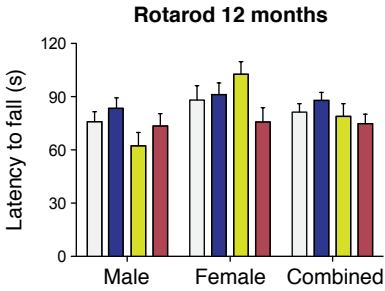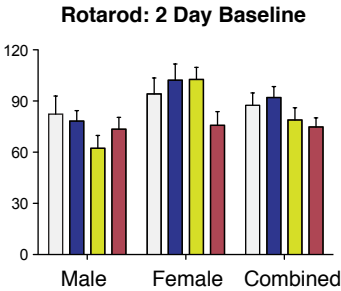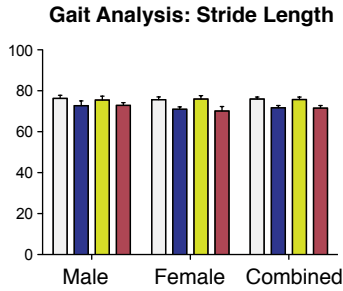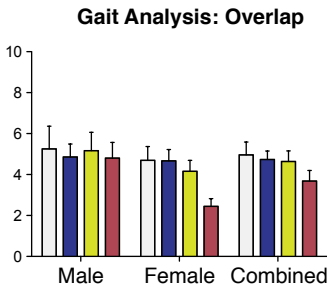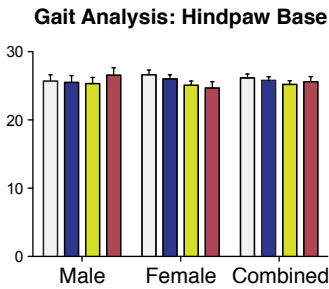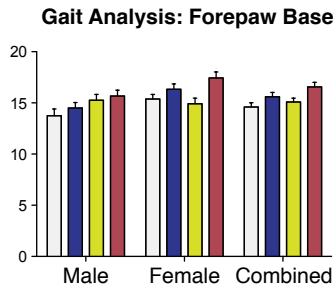

Supplement: Supplementary file 1 [file 13508006]
